# Supplementary material for: Comparative Evaluation of Six Traditional Fermented Soybean Products in East Asia: A Metabolomics Approach
Source: PubMed Central journal article supplement (PMC6780719; doi:10.3390/metabo9090183), 2019-09-13
Supplement: metabolites-09-00183-s001.pdf [file metabolites-09-00183-s001.pdf]

**Table S1** List of significantly different metabolites according to the six FSPs based on GC-TOF-MS data.

| No.                       | Tentative Metabolites <sup>a</sup> | RT <sup>b</sup> (min) | MS Fragment pattern ( <i>m/z</i> ) | Identified ion <sup>c</sup> ( <i>m/z</i> ) | TMS <sup>d</sup> | ID <sup>e</sup> |
|---------------------------|------------------------------------|-----------------------|------------------------------------|--------------------------------------------|------------------|-----------------|
| Amino acids               |                                    |                       |                                    |                                            |                  |                 |
| 1                         | Serine                             | 8.03                  | 73, 204, 218, 100, 147, 75         | 204                                        | 3                | MS              |
| 2                         | Threonine                          | 8.28                  | 73, 117, 219, 218, 57, 147         | 219                                        | 3                | MS              |
| 3                         | Alanine                            | 5.40                  | 147, 73, 116, 204, 148, 59         | 116                                        | 2                | STD             |
| 4                         | Glycine                            | 7.52                  | 174, 73, 147, 86, 175, 59          | 174                                        | 3                | MS              |
| 5                         | Isoleucine                         | 6.20                  | 86, 73, 75, 69, 87, 74             | 86                                         | 1                | STD             |
| 6                         | Phenylalanine                      | 10.30                 | 73, 218, 192, 100, 147, 75         | 218                                        | 2                | STD             |
| 7                         | Leucine                            | 5.97                  | 86, 75, 73, 74, 87, 146            | 170                                        | 1                | STD             |
| 8                         | Methionine                         | 9.42                  | 73, 128, 147, 176, 74, 157         | 128                                        | 2                | MS              |
| 9                         | Valine                             | 5.22                  | 72, 75, 73, 55, 74, 146            | 72                                         | 1                | STD             |
| 10                        | Proline                            | 7.45                  | 142, 73, 107, 256, 140, 77         | 256                                        | 2                | STD             |
| Sugar & sugar derivatives |                                    |                       |                                    |                                            |                  |                 |
| 11                        | Ribose                             | 14.77                 | 73, 147, 98, 103, 217, 160         | 160                                        | 4                | STD             |
| 12                        | Ribitol                            | 15.96                 | 73, 103, 147, 156, 217, 446        | 446                                        | 5                | STD             |
| 13                        | Maltose                            | 17.20                 | 73, 147, 204, 361, 217, 103        | 361                                        | 8                | STD             |
| 14                        | Xylitol                            | 11.04                 | 73, 217, 147, 103, 129, 117        | 217                                        | 5                | STD             |
| 15                        | Glycerol                           | 7.21                  | 73, 147, 117, 103, 205, 133        | 205                                        | 3                | STD             |
| 16                        | Galactose                          | 12.33                 | 73, 147, 103, 117, 205, 129        | 118                                        | 5                | STD             |
| 17                        | Myo-Inositol                       | 13.59                 | 73, 147, 217, 191, 305, 129        | 305                                        | 6                | STD             |
| 18                        | Sucrose                            | 16.55                 | 73, 236, 230, 147, 245, 192        | 236                                        | 4                | MS              |
| 19                        | N-Acetyl-D-glucosamine             | 13.53                 | 73, 147, 129, 202, 87, 205         | 202                                        | 4                | MS              |
| 20                        | Pinitol                            | 11.88                 | 73, 147, 217, 133, 260, 191        | 260                                        | 5                | MS              |
| Organic acids             |                                    |                       |                                    |                                            |                  |                 |
| 21                        | Glutaric acid                      | 9.84                  | 129, 73, 147, 247, 75, 157         | 129                                        | 3                | MS              |
| 22                        | Gluconic acid                      | 13.04                 | 73, 147, 103, 333, 74, 217         | 333                                        | 5                | MS              |
| 23                        | Fumaric acid                       | 7.84                  | 147, 245, 133, 246, 174, 149       | 245                                        | 2                | STD             |
| 24                        | Acetic acid                        | 5.10                  | 147, 73, 66, 177, 148, 75          | 177                                        | 2                | MS              |
| 25                        | Benzoic acid                       | 6.89                  | 179, 105, 135, 77, 51, 180         | 51                                         | 1                | MS              |
| 26                        | Ribonic acid                       | 11.50                 | 73, 147, 292, 103, 217, 75         | 292                                        | 5                | MS              |
| 27                        | Lactic acid                        | 4.95                  | 73, 117, 147, 66, 59, 133          | 88                                         | 2                | STD             |
| Fatty acids               |                                    |                       |                                    |                                            |                  |                 |
| 28                        | Linolenic acid                     | 14.19                 | 75, 73, 79, 55, 129, 67            | 116                                        | 1                | MS              |
| 29                        | Stearic acid                       | 14.29                 | 117, 75, 73, 129, 132, 145         | 117                                        | 1                | MS              |
| 30                        | Glyceryl Palmitate                 | 16.18                 | 73, 147, 57, 55, 371, 203          | 371                                        | 2                | MS              |
| Etc.                      |                                    |                       |                                    |                                            |                  |                 |
| 31                        | Hydroxylamine                      | 5.56                  | 73, 133, 146, 119, 147, 86         | 146                                        | 3                | MS              |

<sup>a</sup> Tentatively identified metabolites were selected as differential variables based on *p*-value < 0.05 and VIP 1, 2 > 1.0, VIP 1 and VIP 2, value of variable importance in projection from PLS1 and PLS2 of PLS-DA model; <sup>b</sup> RT Retention time; <sup>c</sup> *m/z*, the selected ion for identification; <sup>d</sup> TMS, trimethylsilyl; <sup>e</sup> ID, identification. STD, standard compounds. MS, the mass spectra of NIST and in-house libraries.

**Table S2** List of significantly different metabolites according to the six FSPs based on LC-MS

| No.          | Tentative<br>Identifications <sup>a</sup> | UHPLC-LTQ-ESI-IT-MS/MS   |                                |                    |                                                      |                      | UPLC-LTQ-ESI-IT-MS/MS          |                   |
|--------------|-------------------------------------------|--------------------------|--------------------------------|--------------------|------------------------------------------------------|----------------------|--------------------------------|-------------------|
|              |                                           | RT <sup>b</sup><br>(min) | Measured<br>mass( <i>m/z</i> ) |                    | MS <sup>n</sup> fragments( <i>m/z</i> ) <sup>c</sup> | $\lambda$ max(nm)    | Measured<br>mass( <i>m/z</i> ) | EI<br>Correlation |
|              |                                           |                          | [M+H] <sup>+</sup>             | [M-H] <sup>-</sup> |                                                      |                      |                                |                   |
| Isoflavones  |                                           |                          |                                |                    |                                                      |                      |                                |                   |
| 32           | Genistein derivatives                     | 8.03                     | 533                            | 531                | 533>271>243,215,153>1<br>97,187                      | 264                  | 533.12575                      | C2                |
| 33           | Daidzein derivatives                      | 7.33                     | 517                            | 515                | 517>255>227,199,137>1<br>81,171                      | 268(sh) <sup>f</sup> | 517.13140                      | C2                |
| 34           | Genistin                                  | 6.78                     | 433                            | 477 <sup>e</sup>   | 433>271>243,215,153                                  | 260,319(sh)          | 433.11069                      | C2                |
| 35           | Malonyldaidzin                            | 7.06                     | 503                            | 547 <sup>e</sup>   | 503>255>227,199,137>1<br>81                          | 266,366(sh)          | 503.11585                      | C2                |
| 36           | Malonylgenistin                           | 7.83                     | 519                            | 517                | 519>271>243,215,153>1<br>97,187                      | 264,366(sh)          | 519.11036                      | C2                |
| 37           | Glycitein                                 | 8.50                     | 285                            | 283                | 285>270>242>214                                      | 214,270(sh)          | 285.07405                      | C1                |
| 38           | Genistein                                 | 9.43                     | 271                            | 269                | 271>253,243,215,153                                  | 218,258(sh)          | 271.05825                      | C1                |
| 39           | Daidzein                                  | 8.29                     | 255                            | 253                | 255>227,199,137>181>1<br>53                          | 210,259              | 255.06354                      | C1                |
| Soyasaponins |                                           |                          |                                |                    |                                                      |                      |                                |                   |
| 40           | Dehydrosoyasaponin<br>I                   | 11.26                    | 941                            | 985 <sup>e</sup>   | 941>795,597,439                                      | 222                  | 941.50457                      | C4                |
| 41           | Soyasaponin III                           | 11.07                    | 797                            | 795                | 797>599,441>581,423>2<br>97,255                      | 221                  | 797.46322                      | C4                |

Table S2 Cont.

| No                | Tentative Identifications <sup>a</sup> | UHPLC-LTQ-ESI-IT-MS/MS   |                             |                    |                                                      |                   | UPLC-LTQ-Orbitrap-MS/MS     |                       |      |           | I.D. <sup>d</sup> |
|-------------------|----------------------------------------|--------------------------|-----------------------------|--------------------|------------------------------------------------------|-------------------|-----------------------------|-----------------------|------|-----------|-------------------|
|                   |                                        | RT <sup>b</sup><br>(min) | Measured mass( <i>m/z</i> ) |                    | MS <sup>n</sup> fragments( <i>m/z</i> ) <sup>c</sup> | $\lambda$ max(nm) | Measured mass( <i>m/z</i> ) | Elemental Composition | RDB  | Delta ppm |                   |
|                   |                                        |                          | [M+H] <sup>+</sup>          | [M-H] <sup>-</sup> |                                                      |                   |                             |                       |      |           |                   |
| Soyasaponins      |                                        |                          |                             |                    |                                                      |                   |                             |                       |      |           |                   |
| 42                | Soyasaponin IV                         | 11.20                    | 767                         | 812 <sup>e</sup>   | 767>599,441>423                                      | 222               | 767.45250                   | C41H66O13             | 8.5  | -6.669    | LIB               |
| 43                | Soyasaponin V                          | 10.64                    | 959                         | 957                | 959>599>441>581,423>405,281                          | 219               | 959.51409                   | C48H78O19             | 9.5  | -7.208    | Ref [3]           |
| 44                | Soyasaponin I                          | 10.75                    | 943                         | 987                | 943>797,599,441>581,423>335,267                      | 221               | 943.52028                   | C48H78O18             | 9.5  | -6.160    | LIB               |
| 45                | Soyasaponin II                         | 11.02                    | 913                         | 911                | 913>895,781,617,423                                  | 221               | 913.50943                   | C47H76O17             | 9.5  | -6.674    | LIB               |
| 46                | Soyasapogenol C                        | 15.40                    | 441                         | -                  | 441>423>405,365,283,203                              | 224               | 441.36967                   | C30H48O2              | 6.5  | -6.881    | -                 |
| Capsaicinoids     |                                        |                          |                             |                    |                                                      |                   |                             |                       |      |           |                   |
| 47                | Capsaicin                              | 11.91                    | 306                         | -                  | 306>170>137                                          | 222               | 306.20444                   | C18H27NO3             | 5.5  | -6.304    | Ref [5]           |
| 48                | Dihydrocapsaicin                       | 12.53                    | 308                         | -                  | 308>184,137>109                                      | 222               | 308.22012                   | C18H29NO3             | 4.5  | -6.165    | Ref [5]           |
| Lysophospholipids |                                        |                          |                             |                    |                                                      |                   |                             |                       |      |           |                   |
| 49                | LysoPE16:0                             | 13.48                    | 454                         | 452                | 454>436,313>393                                      | 223               | 454.28997                   | C21H44NO7P            | 0.5  | 6.230     | Ref [4]           |
| 50                | LysoPE18:1                             | 13.84                    | 480                         | 478                | 480>462,339>419,265                                  | 223               | 480.30555                   | C23H46NO7P            | 1.5  | -6.071    | -                 |
| 51                | LysoPC18:2                             | 13.11                    | 520                         | 564 <sup>e</sup>   | 521>502,183>443>263,163                              | 223               | 520.33628                   | C26H50NO7P            | 2.5  | -6.699    | Ref [4]           |
| 52                | LysoPC18:3                             | 12.46                    | 518                         | 562 <sup>e</sup>   | 518>500>441>305,181                                  | 222               | 518.32070                   | C26H48NO7P            | 3.5  | -6.590    | Ref [4]           |
| 53                | LysoPC18:1                             | 13.92                    | 522                         | 566 <sup>e</sup>   | 522>504,184>445>309,265,163                          | 224               | 522.35213                   | C26H52NO7P            | 1.5  | -6.291    | Ref [2]           |
| Etc.              |                                        |                          |                             |                    |                                                      |                   |                             |                       |      |           |                   |
| 54                | Flazin                                 | 8.68                     | 309                         | 307                | 309>291>281>263,222                                  | 216,271(sh)       | 309.08515                   | C17H12N2O4            | 12.5 | -5.932    | -                 |

Table S2 Cont.

| No.                 | Tentative Identifications <sup>a</sup> | UHPLC-LTQ-ESI-IT-MS/MS   |                             |                    |                                                      | UPLC-LTQ-Orbitrap-MS/MS |                             |                       |      | I.D. <sup>d</sup> |           |
|---------------------|----------------------------------------|--------------------------|-----------------------------|--------------------|------------------------------------------------------|-------------------------|-----------------------------|-----------------------|------|-------------------|-----------|
|                     |                                        | RT <sup>b</sup><br>(min) | Measured mass( <i>m/z</i> ) |                    | MS <sup>n</sup> fragments( <i>m/z</i> ) <sup>c</sup> | λ <sub>max</sub> (nm)   | Measured mass( <i>m/z</i> ) | Elemental Composition | RDB  |                   | Delta ppm |
|                     |                                        |                          | [M+H] <sup>+</sup>          | [M-H] <sup>-</sup> |                                                      |                         |                             |                       |      |                   |           |
| Non-Identifications |                                        |                          |                             |                    |                                                      |                         |                             |                       |      |                   |           |
| 55                  | N.I. 1                                 | 1.15                     | 276                         | 274                | 276>258>210>164                                      | 276(sh)                 | 276.14244                   | C12H21NO6             | 2.5  | -6.243            | -         |
| 56                  | N.I. 2                                 | 1.42                     | 425                         | 423                | 425>407>389>341                                      | 271                     | 425.20046                   | C20H28N2O8            | 7.5  | -5.250            | -         |
| 57                  | N.I. 3                                 | 6.08                     | 245                         | -                  | 245>217,119>172,70                                   | 268(sh)                 | 245.18464                   | C12H24N2O3            | 1.5  | -5.421            | -         |
| 58                  | N.I. 4                                 | 9.27                     | 733                         | 731                | 733>602>489>461,376                                  | 211,260                 | 733.48137                   | C41H66O10N            | 9.0  | 7.391             | -         |
| 59                  | N.I. 5                                 | 9.69                     | 927                         | 971 <sup>e</sup>   | 927>811,613,455>595,437                              | 219                     | 927.49048                   | C49H70N2O15           | 15.5 | 6.021             | -         |
| 60                  | N.I. 6                                 | 11.00                    | 274                         | -                  | 274>256>102                                          | 221                     | 274.27192                   | C16H35NO2             | -0.5 | -7.787            | -         |
| 61                  | N.I. 7                                 | 11.86                    | 376                         | 420 <sup>e</sup>   | 376>302,293>275                                      | 222                     | 376.25703                   | C21H33N3O3            | 6.5  | -6.481            | -         |
| 62                  | N.I. 8                                 | 16.52                    | 256                         | -                  | 256>186,115>88                                       | 225                     | 256.26149                   | C16H33NO              | 0.5  | -7.809            | -         |
| 63                  | N.I. 9                                 | 16.82                    | 428                         | 426                | 428>382,166>120                                      | 224                     | 428.31289                   | C27H41NO3             | 7.5  | -7.076            | -         |
| 64                  | N.I. 10                                | 16.90                    | 394                         | 392                | 394>376,348,131>292                                  | 225                     | 394.32863                   | C24H43NO3             | 3.5  | -7.458            | -         |
| 65                  | N.I. 11                                | 17.49                    | 370                         | 368                | 370>352,324,132                                      | 225                     | 370.32932                   | C22H43NO3             | 1.5  | -6.078            | -         |
| 66                  | N.I. 12                                | 17.70                    | 396                         | 394                | 396>378,350,132>333,263,212                          | 225                     | 396.34478                   | C24H45NO3             | 2.5  | -6.158            | -         |
| 67                  | N.I. 13                                | 17.88                    | 384                         | -                  | 384>367,302,245,204,122                              | 226                     | 384.32332                   | C26H41NO              | 6.5  | -7.211            | -         |

<sup>a</sup> Tentatively identified metabolites were selected as differential variables based on *p*-value < 0.05 and VIP 1, 2 > 1.0; VIP 1 and VIP 2, value of variable importance in projection from PLS1 and PLS2 of PLS-DA model; <sup>b</sup> RT, Retention time; <sup>c</sup> MS<sup>n</sup> fragment patterns detected in positive mode; <sup>d</sup> I.D., identification; LIB, In-house library; Ref., References; <sup>e</sup> Adduct ion is formic acid, [M+COOH]<sup>-</sup>; <sup>f</sup> sh, Shoulder; N.I., non-identification.

## References

1. Kudou, S.; Tsuizaki, I.; Uchida, T.; Okubo, K. Purification and some properties of soybean saponin hydrolase from *Aspergillus oryzae* KO-2. *Agric. Biol. Chem.* **1991**, *55*(1), 31-36.
2. Seo, H.S.; Lee, S.; Singh, D.; Shin, H.W.; Cho, S.A.; Lee, C.H. Untargeted metabolite profiling for koji-fermentative bioprocess unravels the effects of varying substrate types and microbial inocula. *Food chem.* **2018**, *266*, 161-169.
3. Lee, S.Y.; Lee, S.; Lee, S.; Oh, J.Y.; Jeon, E.J.; Ryu, H.S.; Lee, C.H. Primary and secondary metabolite profiling of *doenjang*, a fermented soybean paste during industrial processing. *Food chem.* **2014**, *165*, 157-166
4. Lee, G.M.; Suh, D.H.; Jung, E.S.; Lee, C.H. Metabolomics provides quality characterization of commercial *gochujang* (fermented pepper paste). *Molecules.* **2016**, *21*(7), 921.
5. Jang, Y.K.; Shin, G.R.; Jung, E.S.; Lee, S.; Lee, S.; Singh, D.; Jang, E.S.; Shin, D.J.; Kim, H.; Shin, H.W.; Moon, B. S.; Lee, C.H. Process specific differential metabolomes for industrial *gochujang* types (pepper paste) manufactured using white rice, brown rice, and wheat. *Food chem.* **2017**, *234*, 416-424.
6. Baiocchi, C.; Medana, C.; Giancotti, V.; Aigotti, R.; Dal Bello, F.; Massolino, C.; Gastaldi, D.; Grandi, M. Qualitative characterization of *Desmodium adscendens* constituents by high-performance liquid chromatography-diode array ultraviolet-electrospray ionization multistage mass spectrometry. *Eur J Mass Spectrom.* **2013**, *19*(1), 1-15.

**Table S3.** List of the sample product and producer name

| <b>Sample No.</b> | <b>Product</b>        | <b>Product name</b>               | <b>Producer</b>                                 |
|-------------------|-----------------------|-----------------------------------|-------------------------------------------------|
| 1                 | Natto<br>(NT)         | Shikaya Ganko Oyaji Kotsubu Natto | Shikaya Co., LTD                                |
| 2                 |                       | Suzusei Natto                     | Suzusei Shokuhin Co., LTD                       |
| 3                 |                       | Azuma Natto Oraganic              | Azuma Shokuhin Co., LTD                         |
| 4                 |                       | Power kid Natto                   | Marumiya Co., LTD                               |
| 5                 |                       | Okame Natto                       | Takanofoods Co., LTD                            |
| 6                 | Cheonggukjang<br>(CG) | bamboo salt Cheonggukjang         | YoungPyung                                      |
| 7                 |                       | SeoBunRae Cheonggukjang           | Seoilfarm                                       |
| 8                 |                       | PulDangGol Cheonggukjang          | PulDangGol                                      |
| 9                 |                       | DanYang Cheonggukjang             | JukHyangKong                                    |
| 10                |                       | JeonYoungJu Cheonggukjang         | ChungHo food                                    |
| 11                | Doenjang<br>(DJ)      | bamboo salt Doenjang (Sujak)      | Sambou                                          |
| 12                |                       | MooSooChon Doenjang               | MooSooChon                                      |
| 13                |                       | Jeju blue soybean Doenjang        | Greensoy                                        |
| 14                |                       | Mac Doenjang                      | Koreamac                                        |
| 15                |                       | Tradiotional Doenjnag             | SunJae food                                     |
| 16                | Miso<br>(MS)          | Awase Miso                        | Marusanai CO., LTD                              |
| 17                |                       | Shinsyu-ichi Miso                 | Miyasaka Jozo CO., LTD                          |
| 18                |                       | Okasan Miso (Awase)               | Hanamaruki Foods Inc.                           |
| 19                |                       | Aawase Miso                       | Masuyamiso CO., LTD                             |
| 20                |                       | Siro Miso                         | Marukome CO., LTD                               |
| 21                | Doubanjiang<br>(DB)   | Chili bean sauce (Toban Djan)     | Lee Kum Kee CO., LTD                            |
| 22                |                       | Cong Ban Lv Soybean Paste         | Shandong Shinho Food Industries CO., LTD        |
| 23                |                       | Har Har Hot bean sauce            | Haha Jiang Yuan CO., LTD                        |
| 24                |                       | Szechuan Doubanjiang              | Sichuan Dandan Pixian Bean Paste Group CO., LTD |
| 25                |                       | Doubanjiang                       | Kikkoman Corporation                            |
| 26                | Tianmianjiang<br>(TM) | Tianmianjiang                     | Hsien Erh Mei Foods Industry CO., LTD           |
| 27                |                       | Hogumi Tianmianjiang              | Weihai Sihai Brewed CO., LTD                    |
| 28                |                       | Cong Ban Lv Tianmianjiang         | Shandong Shinho Food Industries CO., LTD        |
| 29                |                       | Tianmianjiang                     | Tian Jin Limin Condiment CO., LTD               |
| 30                |                       | Tianmianjiang                     | Youki Food CO., LTD                             |
